# Supplementary material for: Impact of lysine supplementation on growth and development ofHermetia illucens larvae
Source: Atypon-hosted journal article supplement (doi:10.3920/jiff2020.0059), 2021-07-14
Supplement: jiff2020.0059_esm.pdf [file jiff2020.0059_esm.pdf]

**Impact of lysine supplementation on growth and development of *Hermetia illucens* larvae**

M. Koethe, J. Taubert and I. Vervuert

Table S1. Statistic distribution of crude fat (F), crude protein (P), and lysine (L) content values in substrate and *H. illucens* larvae expressed as % dry matter.

|                       | Group   | Analyte | Minimum | 25% percentile | Median | 75% percentile | Maximum |
|-----------------------|---------|---------|---------|----------------|--------|----------------|---------|
| Substrate composition | control | F       | 13.43   | 13.80          | 15.25  | 15.85          | 17.12   |
|                       |         | P       | 15.85   | 16.68          | 18.47  | 19.04          | 19.66   |
|                       |         | L       | 0.1178  | 0.2163         | 0.2900 | 0.3976         | 0.4211  |
|                       | 0.5LS   | F       | 11.75   | 13.78          | 14.56  | 15.81          | 16.71   |
|                       |         | P       | 16.45   | 18.23          | 19.46  | 20.11          | 20.24   |
|                       |         | L       | 0.5351  | 0.6398         | 0.6876 | 0.8081         | 1.108   |
|                       | 1LS     | F       | 12.42   | 13.18          | 14.11  | 15.58          | 16.45   |
|                       |         | P       | 17.56   | 19.07          | 19.42  | 21.01          | 21.94   |
|                       |         | L       | 0.7226  | 0.8882         | 1.145  | 1.329          | 1.419   |
| 3LS                   | F       | 10.28   | 11.24   | 13.44          | 14.73  | 15.79          |         |
|                       | P       | 21.56   | 23.72   | 24.71          | 25.62  | 26.31          |         |
|                       | L       | 1.693   | 2.169   | 2.614          | 2.779  | 3.000          |         |
| Larval composition    | control | F       | 40.49   | 42.96          | 46.03  | 49.26          | 49.93   |
|                       |         | P       | 28.13   | 30.13          | 32.49  | 33.36          | 33.78   |
|                       |         | L       | 0.3721  | 0.4675         | 0.6111 | 0.7212         | 0.8181  |
|                       | 0.5LS   | F       | 40.56   | 42.43          | 44.97  | 47.37          | 47.99   |
|                       |         | P       | 30.24   | 31.40          | 33.06  | 33.67          | 34.41   |
|                       |         | L       | 0.4835  | 0.5205         | 0.5804 | 0.7929         | 0.9041  |
|                       | 1LS     | F       | 41.38   | 42.07          | 44.20  | 46.30          | 48.42   |
|                       |         | P       | 30.25   | 32.42          | 32.90  | 33.36          | 33.85   |
|                       |         | L       | 0.3883  | 0.5041         | 0.6135 | 0.6818         | 0.7551  |
| 3LS                   | F       | 40.26   | 41.90   | 44.16          | 44.91  | 45.14          |         |
|                       | P       | 29.26   | 31.23   | 31.84          | 33.11  | 33.49          |         |
|                       | L       | 0.4340  | 0.5687  | 0.8000         | 0.8919 | 1.011          |         |

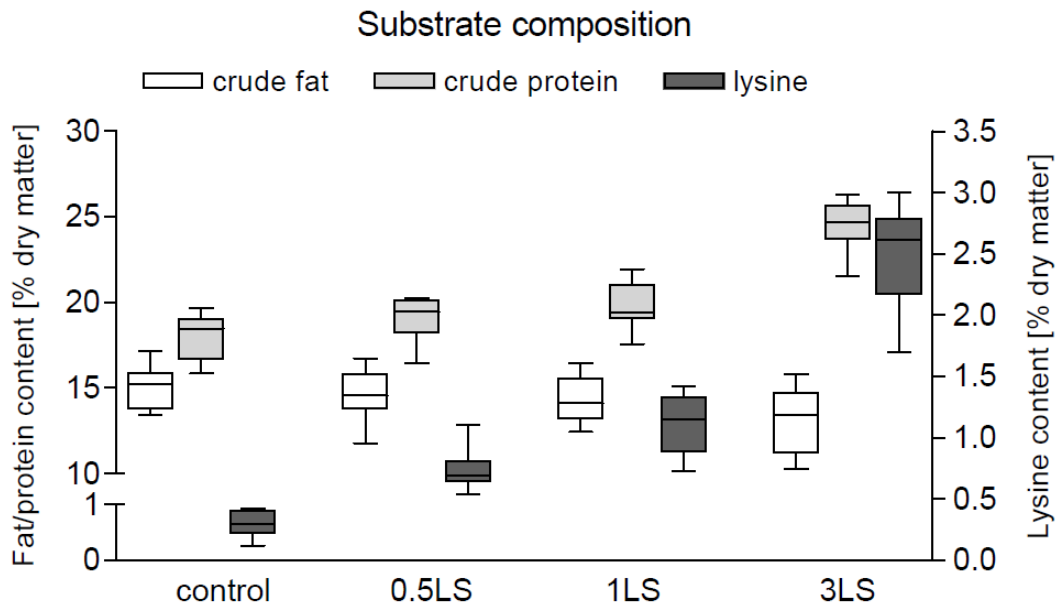

Figure S1. Boxplot visualization of crude fat, crude protein, and lysine content of basic (control) and lysine-supplemented substrate (0.5LS, 1LS, 3LS). Boxes comprise 1<sup>st</sup> to 3<sup>rd</sup> quartile, vertical line in the box represents median, and whiskers describe minimum and maximum values. Data is calculated from 10 repetition trials.

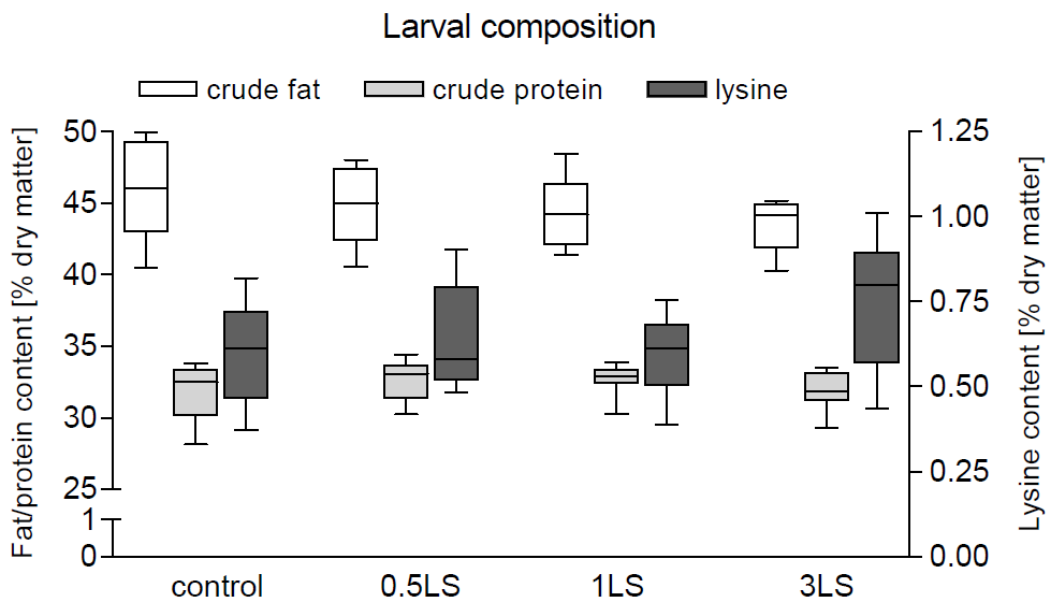

Figure S2. Boxplot visualization of crude fat, crude protein, and lysine content of *Hermetia illucens* larvae fed either with basic (control) or lysine-supplemented substrate (0.5LS, 1LS, 3LS). Boxes comprise 1<sup>st</sup> to 3<sup>rd</sup> quartile, vertical line in the box represents median, and whiskers describe minimum and maximum values. Data is calculated from 10 repetition trials.
